# Supplementary material
Source: PubMed Central journal article supplement (PMC4345310)
Supplement: mtna201476x1.pdf [file mtna201476x1.pdf]

Supplement figure S1

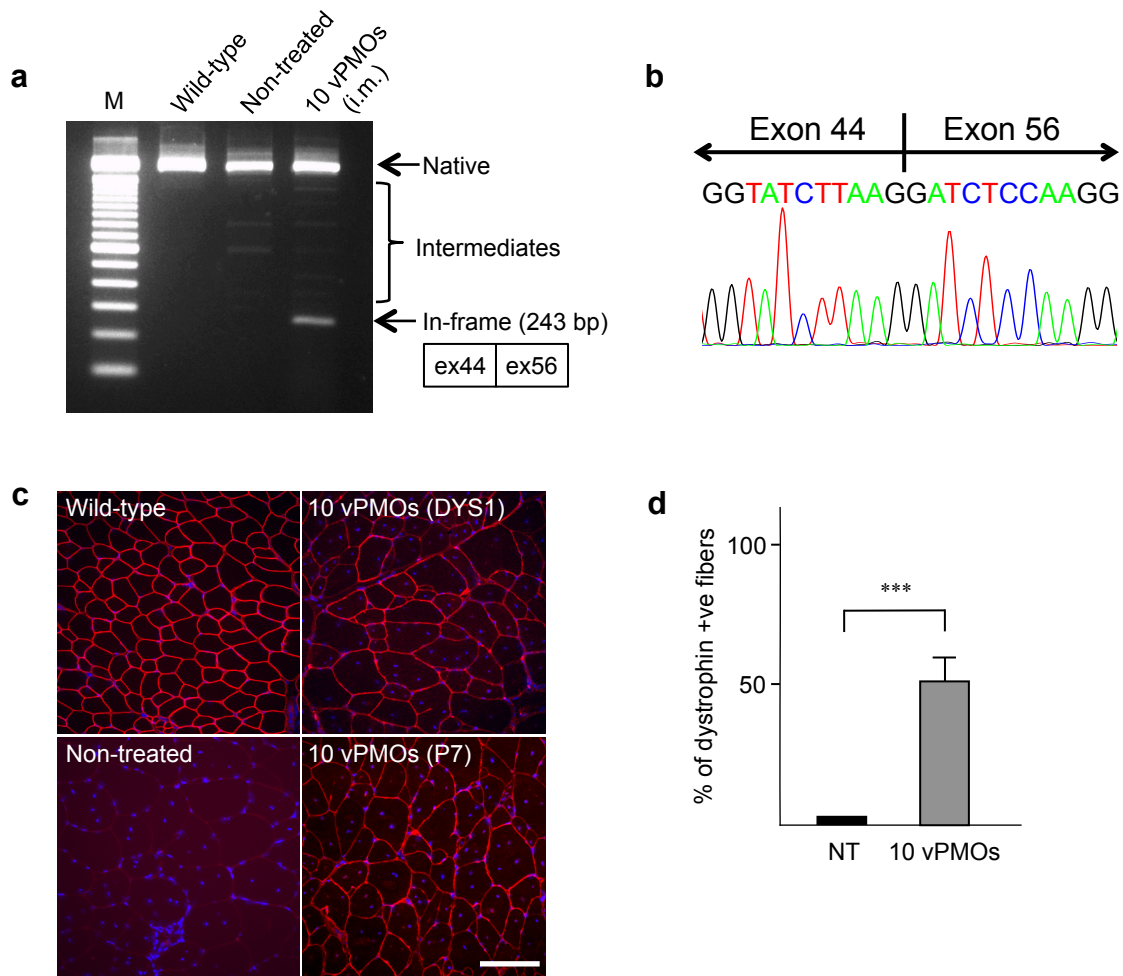

**Figure S1. Intramuscular (i.m.) injection of the ten-vPMO cocktail at 0.3  $\mu$ g (0.03  $\mu$ g of each vPMO).**

(a) Skipped dystrophin mRNA induced by single i.m. administration of the ten-vPMO cocktail into the tibialis anterior (TA) muscle. Expression was detected by RT-PCR with primer pair designed on exon 44 and 56. M, 100 bp marker. (b) Skipping of exons 45–55 and boundary of exons 44 and 56 confirmed by direct sequencing. (c) Immunohistochemistry with DYS1 antibody against peptides from exons 26–30 and dystrophin P7 antibody against peptides from exon 57 in treated TA muscle (red). Nuclei counterstained with DAPI (blue). Representative data are shown. Scale bar, 100  $\mu$ m. (d) Significant increase in the percentage of dystrophin-positive fibers 2 wk after local injection compared to non-treated (NT) TA muscle ( $n = 3$  in each group). \*\*\* $P < 0.001$ .
